# Supplementary material for: Patterned polyaniline encapsulated in titania nanotubes for electrochromism
Source: Royal Society of Chemistry journal article supplement (doi:10.1039/c7cp07617g), 2018-01-01
Supplement: c7cp07617g1.pdf [file c7cp07617g1.pdf]

Supporting information for:

## **Patterned polyaniline encapsulated in titania nanotubes for Electrochromism**

Haiming Lv,<sup>‡a</sup> Yi Wang,<sup>‡a</sup> Lei Pan,<sup>b</sup> Leipeng Zhang,<sup>a</sup> Hangchuan Zhang,<sup>a</sup> Lei Shang,<sup>a</sup> Huiying  
Qu,<sup>b</sup> Na Li,<sup>b</sup> Jiupeng Zhao<sup>b</sup> and Yao Li<sup>\*a</sup>

<sup>a</sup> Center for Composite Materials and Structure, Harbin Institute of Technology, Harbin 150001,  
China, E-mail: yaoli@hit.edu.cn.

<sup>b</sup> School of Chemistry and Chemical, Harbin Institute of Technology, Harbin 150001, China

<sup>‡</sup> These two authors contributed equally to this work

<sup>\*</sup>Corresponding author:

E-mail address: yaoli@hit.edu.cn (Prof. Y. Li); Fax: +86-451-86403767; Tel:+86-451-86403767

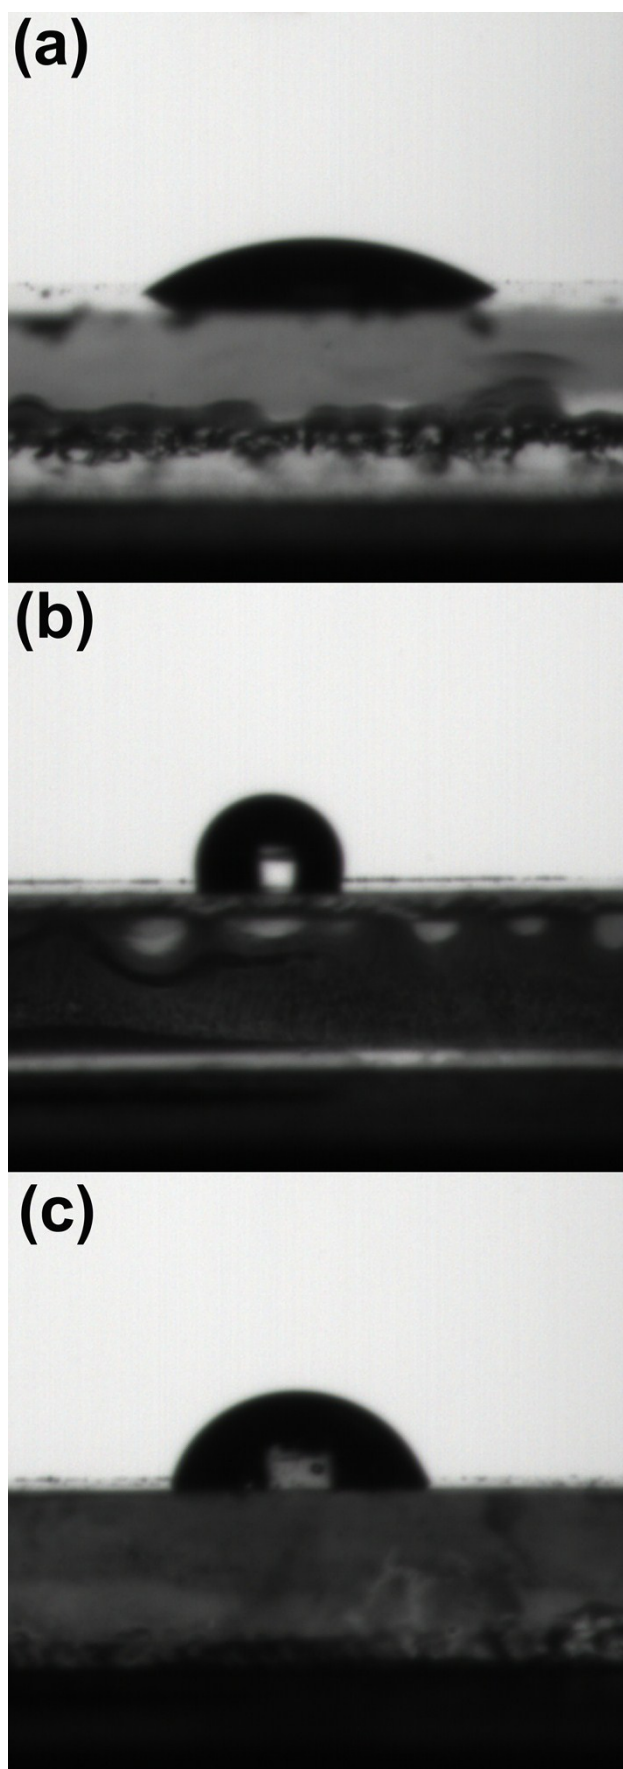

**Figure S1** Contact angles of (a) the as-prepared, (b) PTES modified  $\text{TiO}_2$  film , and (c)

following UV irradiated (20 min), respectively.

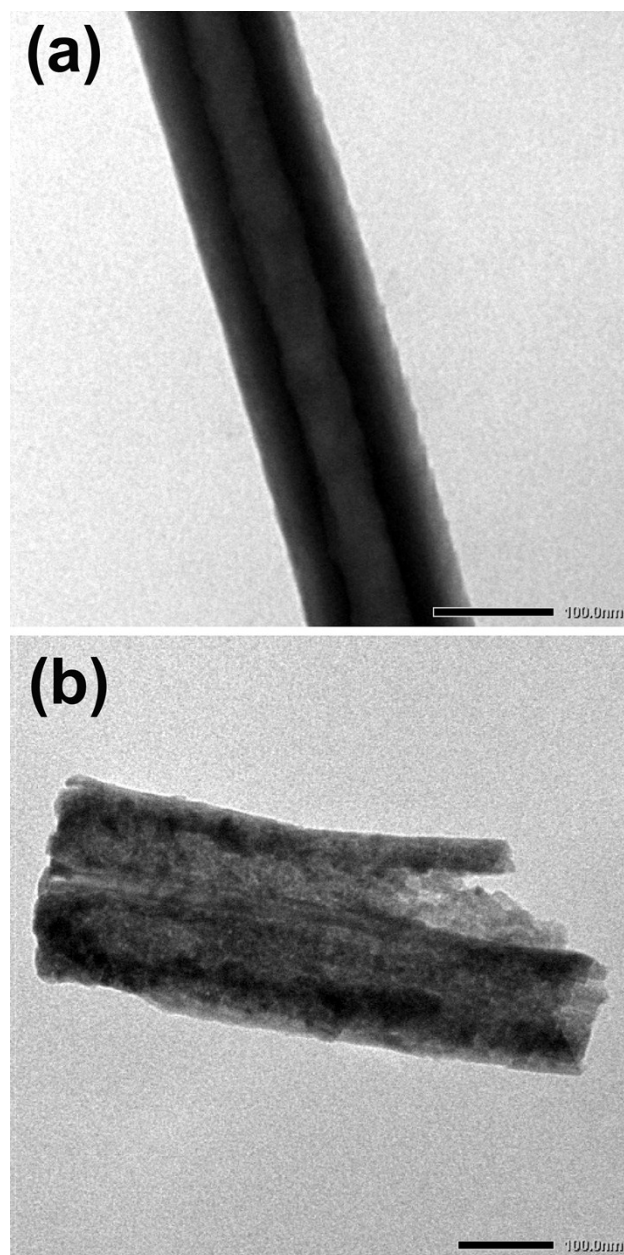

**Figure S2** TEM of (a)  $\text{TiO}_2$  nanotube , and (b)  $\text{TiO}_2/\text{PANI}$ , respectively.
